# Supplementary material for: Application of CRISPR/Cas9 System for Efficient Gene Editing in Peanut
Source: MDPI journal article supplement (doi:10.3390/plants11101361), 2022-05-20
Supplement: s1 [file s1]

Map of vector pDW3872 (dual *Bsa*I cut sites for insertion of the designed gRNA)

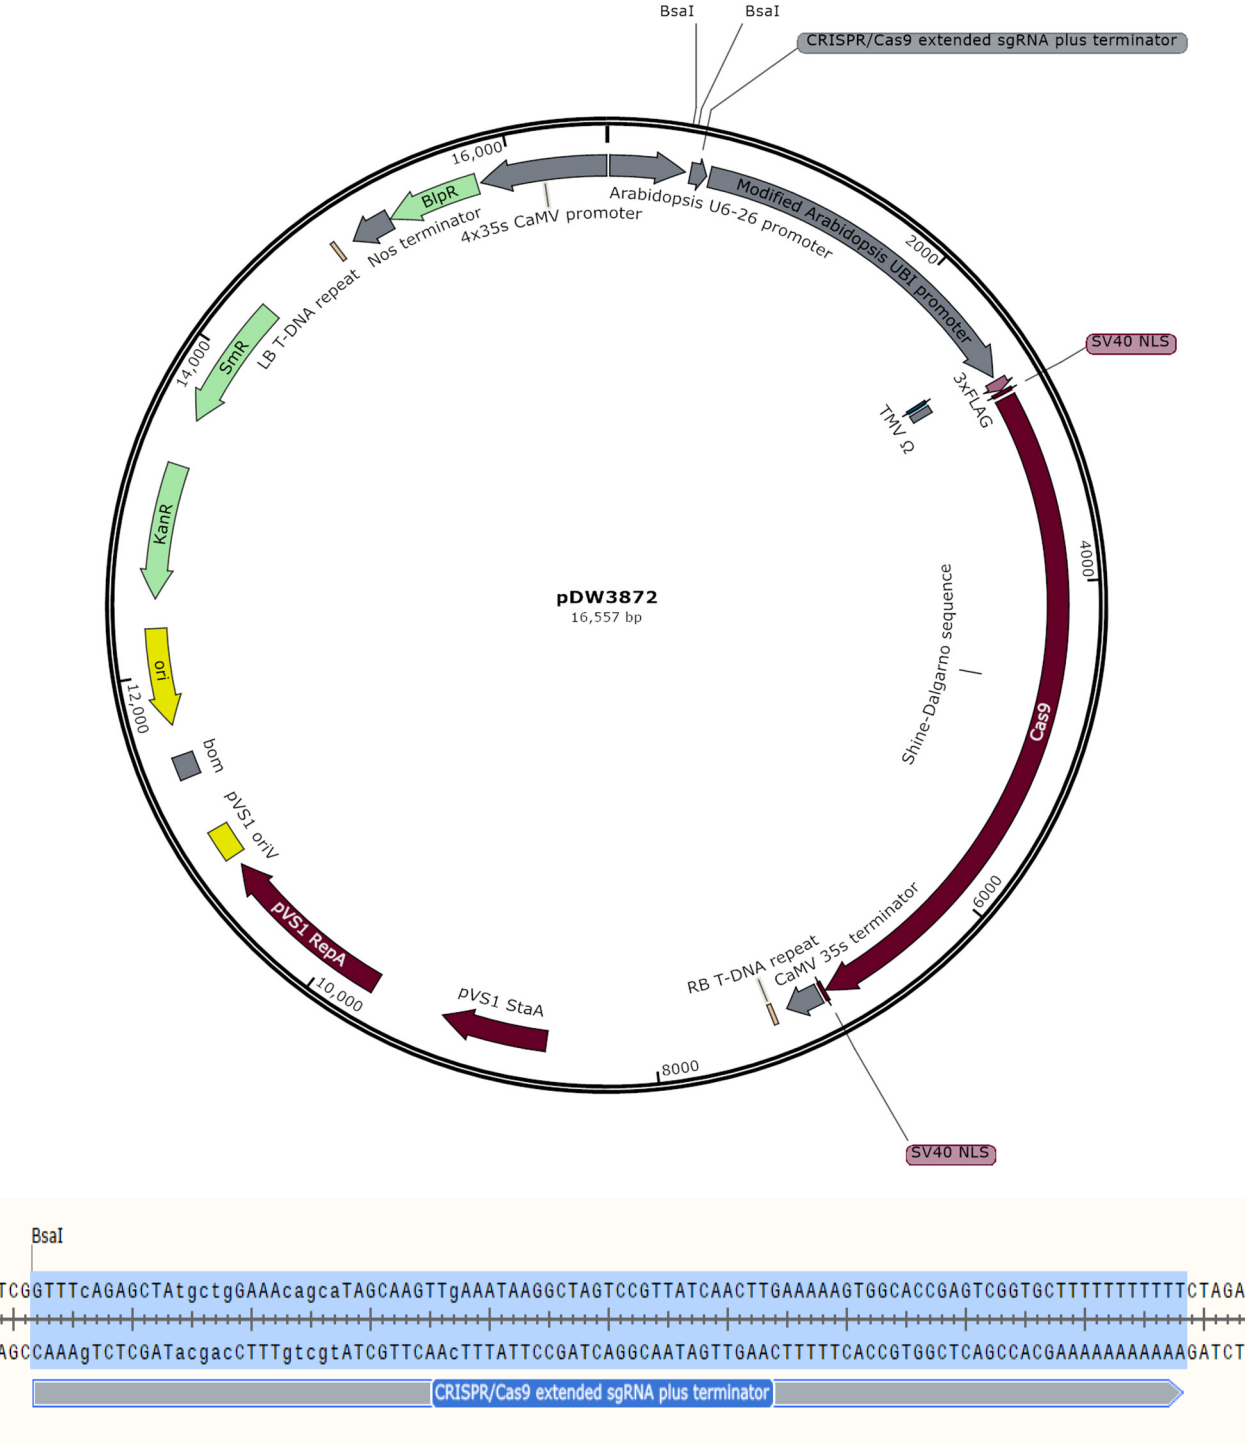

Extended gRNA scaffold plus terminator (492...588 = 97 bp), 40% GC.

Map of vector pDW3877 (dual *BsaI* cut sites for insertion of the designed gRNA)

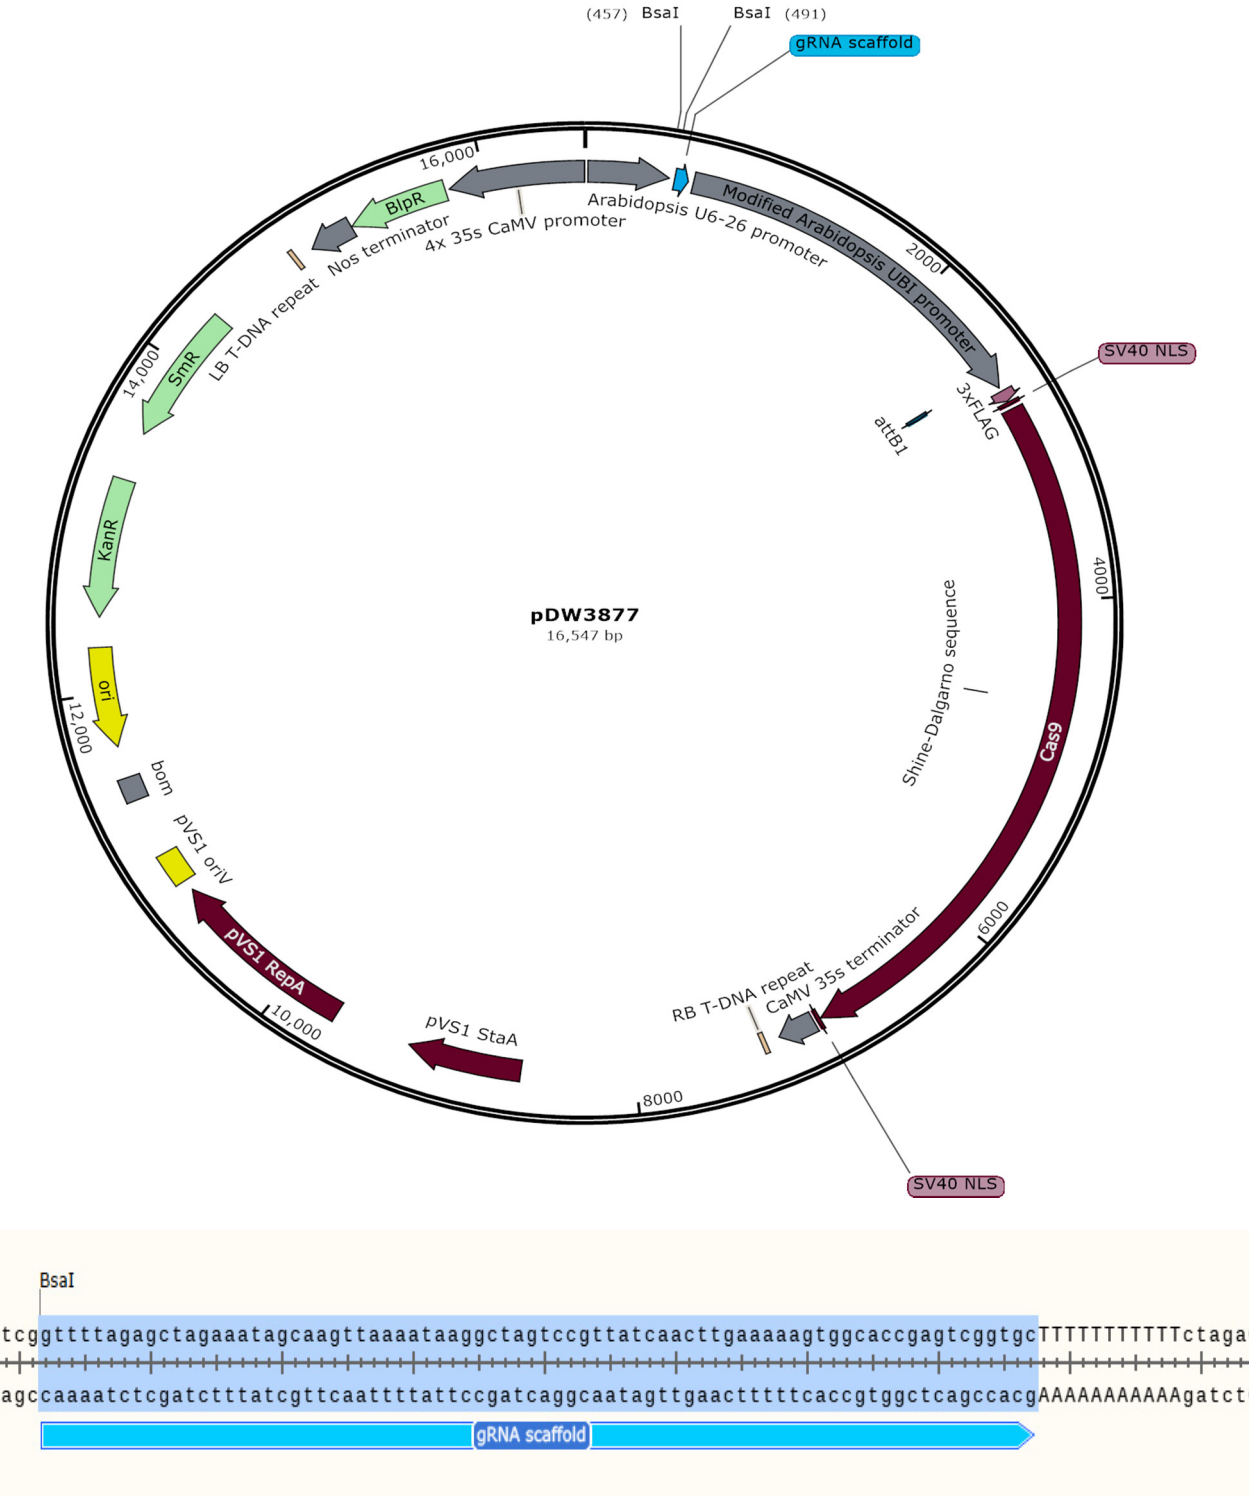

gRNA scaffold (492...567 = 76 bp), 41% GC

Figure S1. Map of two vectors.
